# Supplementary material
Source: publisher figshare collection journal article supplement (https://tandf.figshare.com/ndownloader/files/15651200)

# Supplement

## Detection of Excessive Activities in Time Series of Graphs

Suchismita Goswami and Edward J. Wegman

Computational and Data Sciences, George Mason University, Fairfax VA

Here we provide the weekly networks (week 1 to week 4) from June 2003 to June 2004 obtained from the e-mail metadata over 52 weeks around the primary cluster.

June-2003

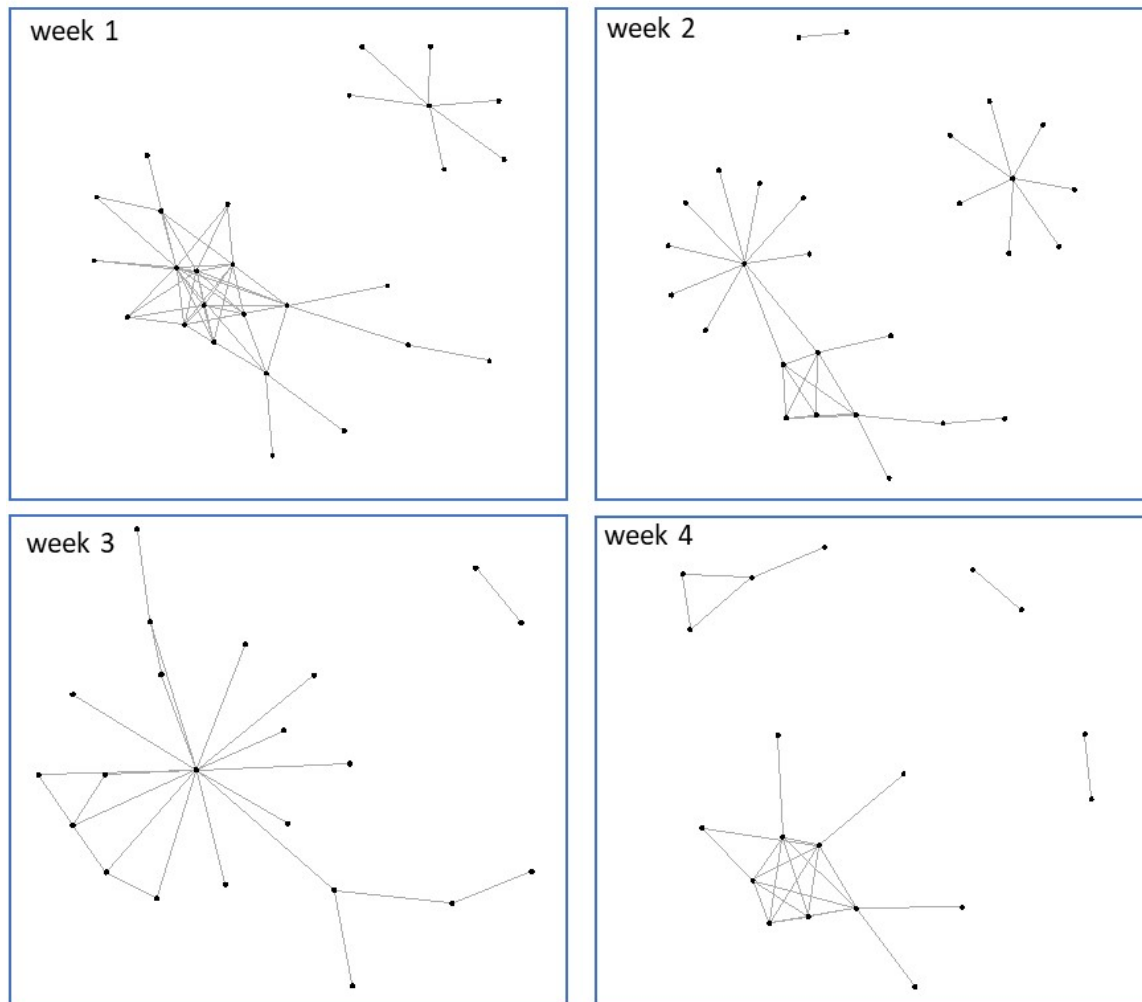

## July-2003

week 1

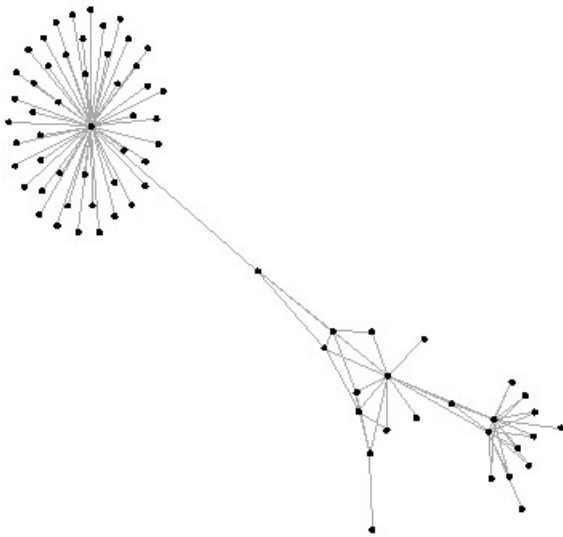

week 2

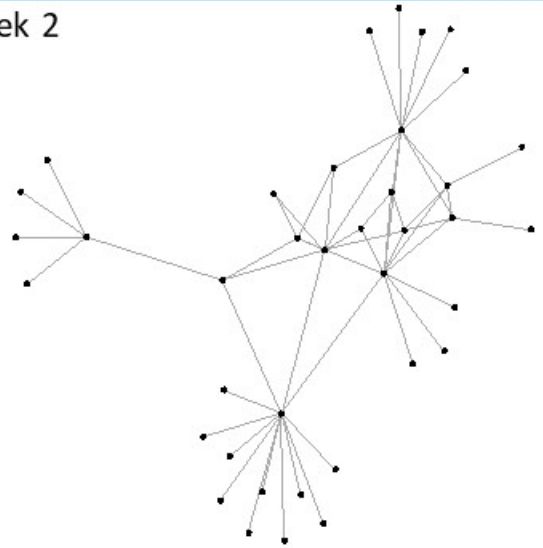

week 3

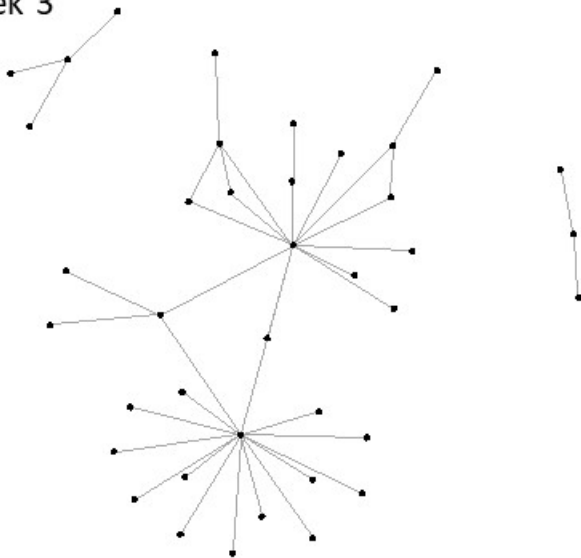

week 4

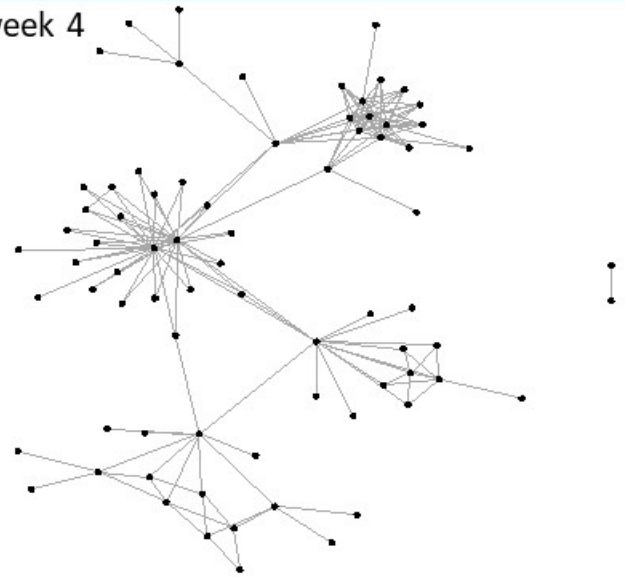

## August-2003

week 1

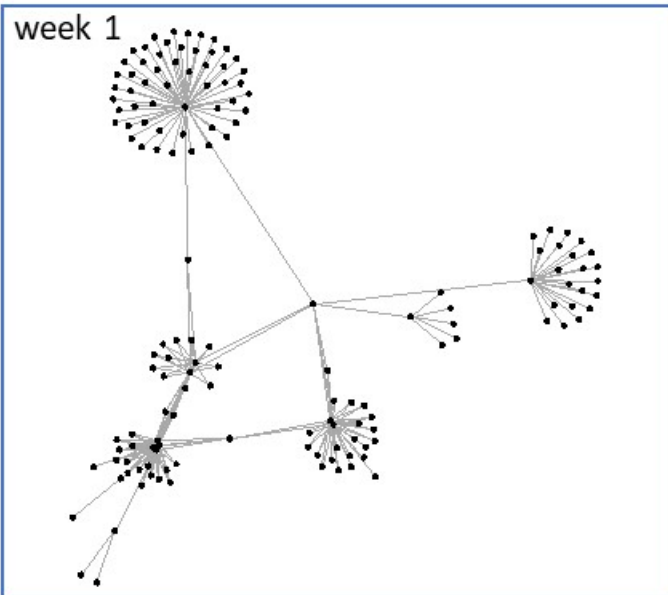

week 2

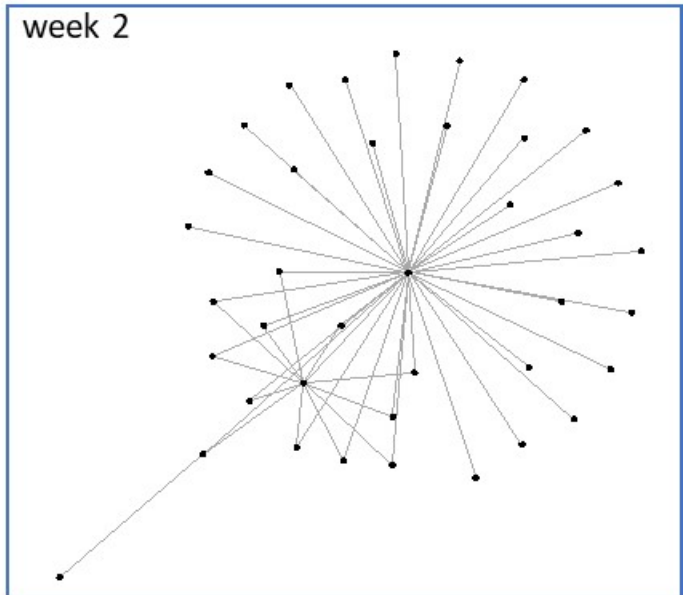

week 3

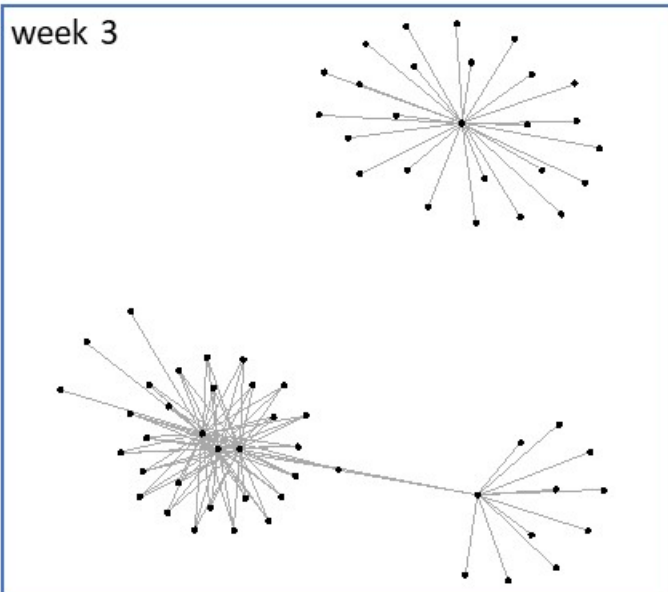

week 4

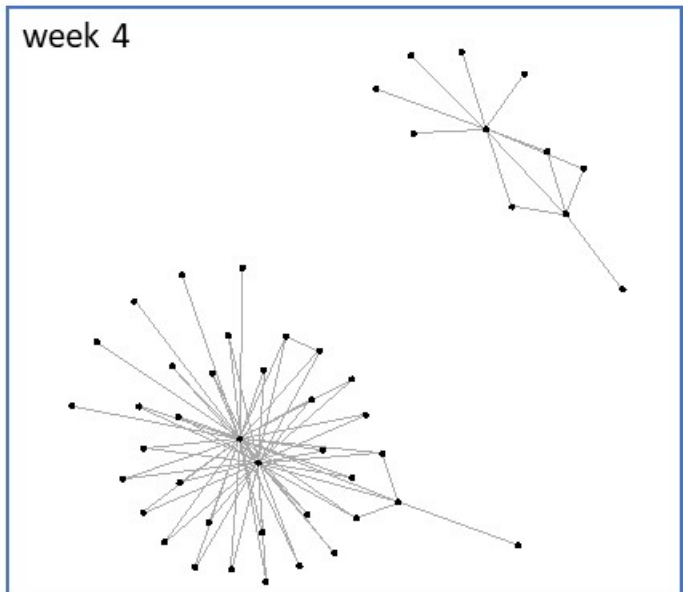

## September-2003

week 1

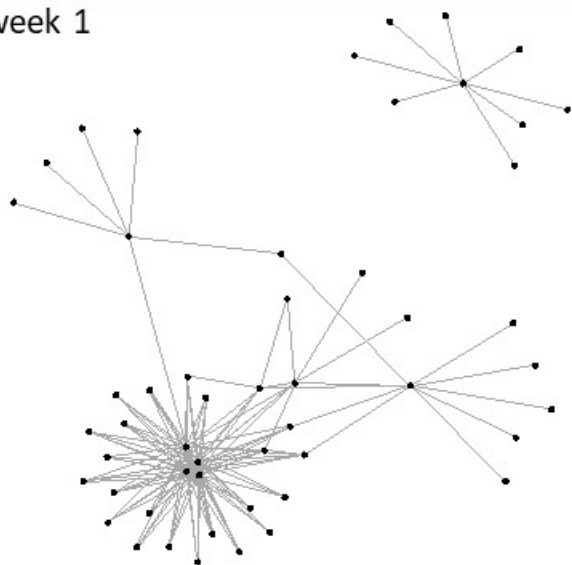

week 2

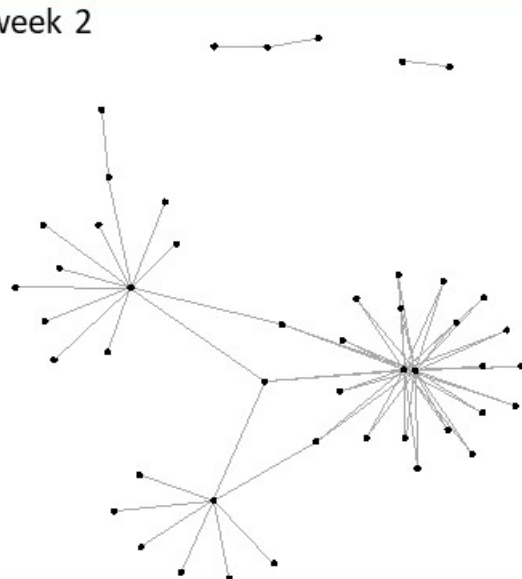

week 3

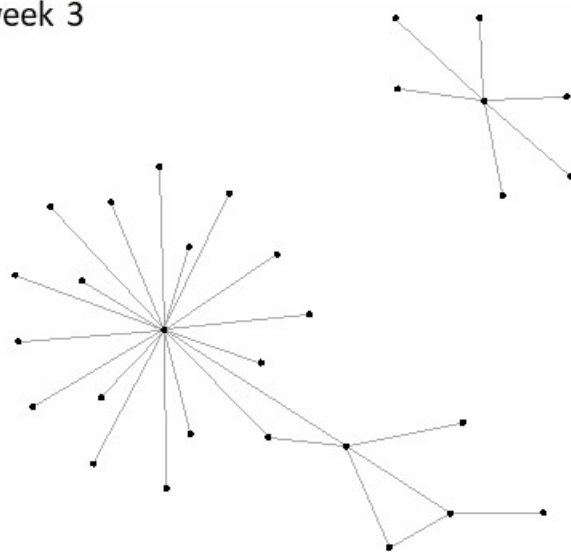

week 4

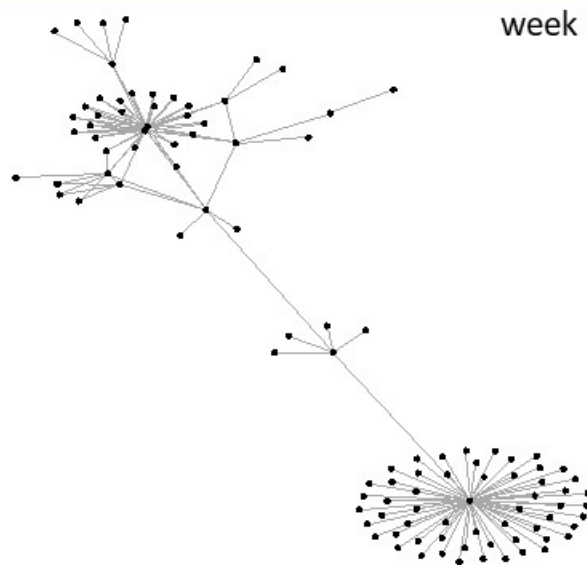

## October-2003

week 1

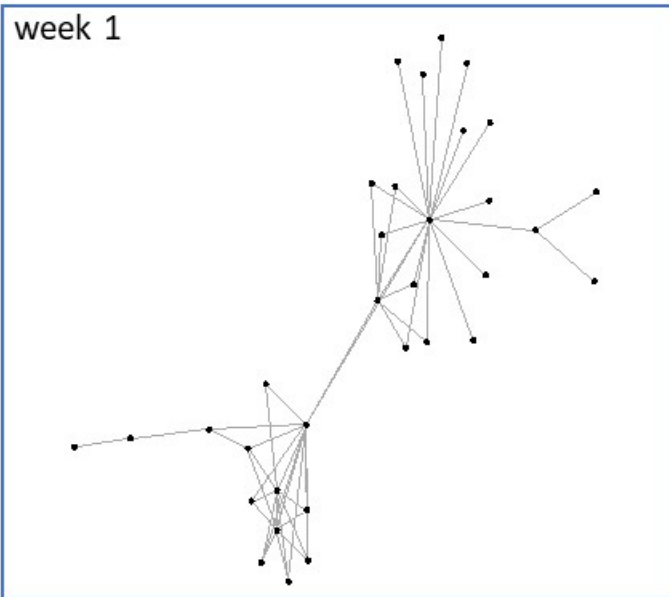

week 2

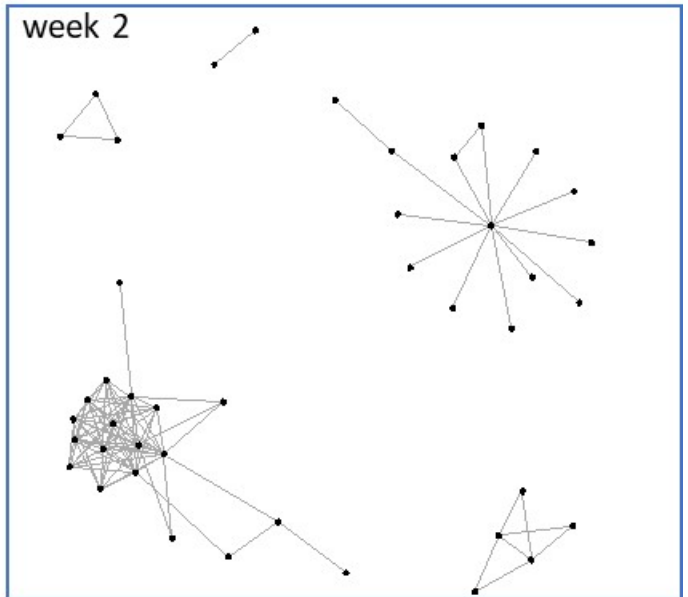

week 3

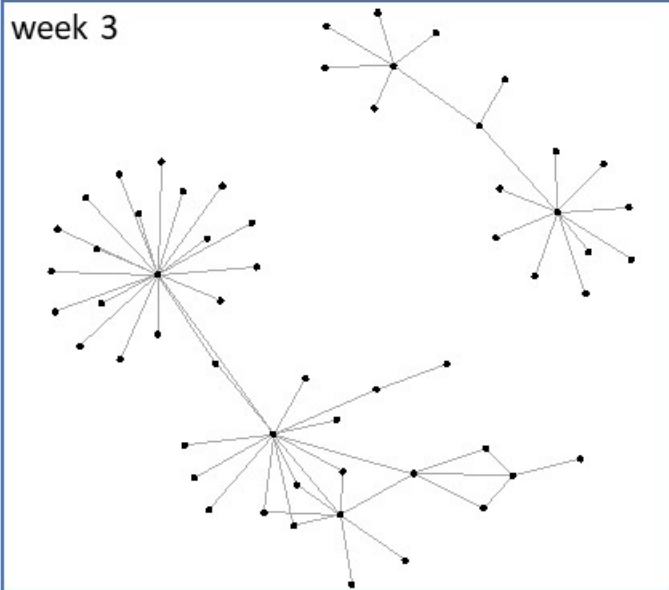

week 4

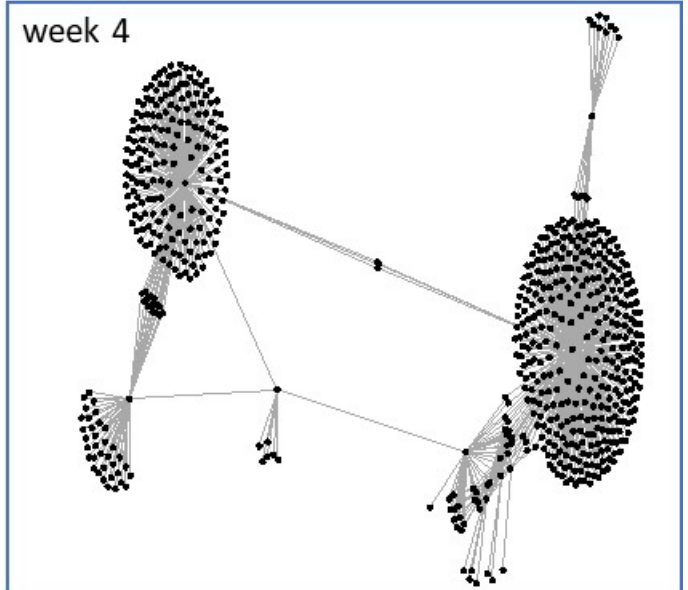

## November-2003

week 1

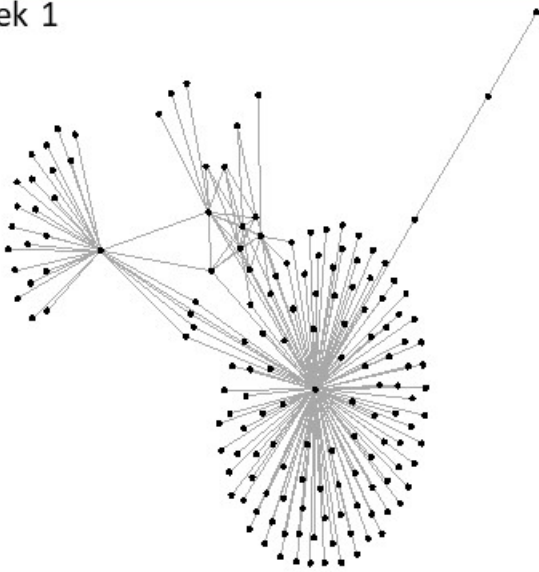

week 2

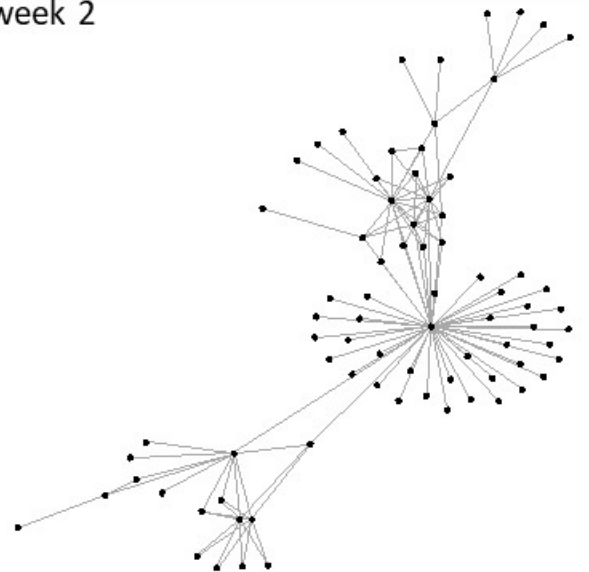

week 3

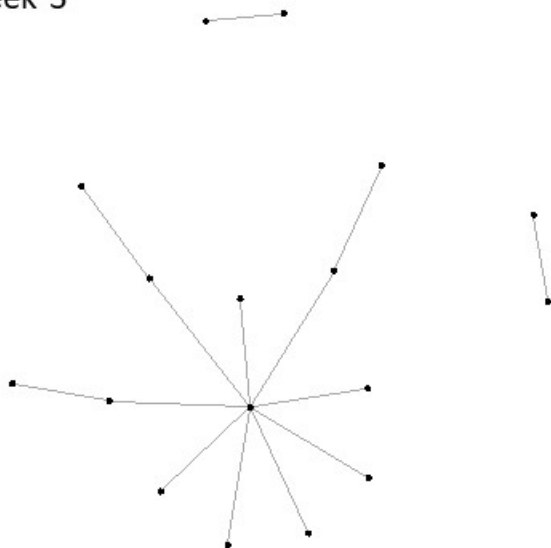

week 4

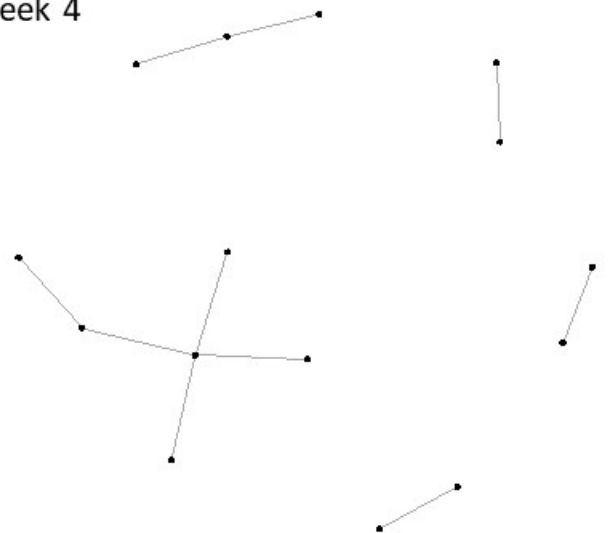

## December-2003

week 1

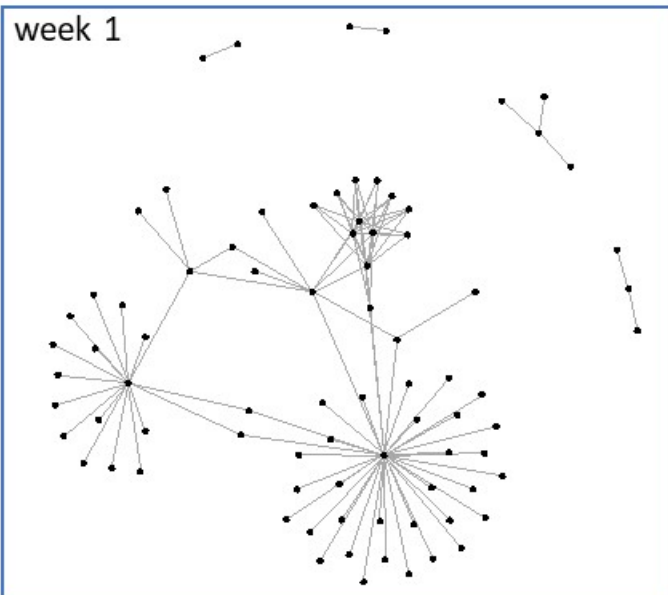

week 2

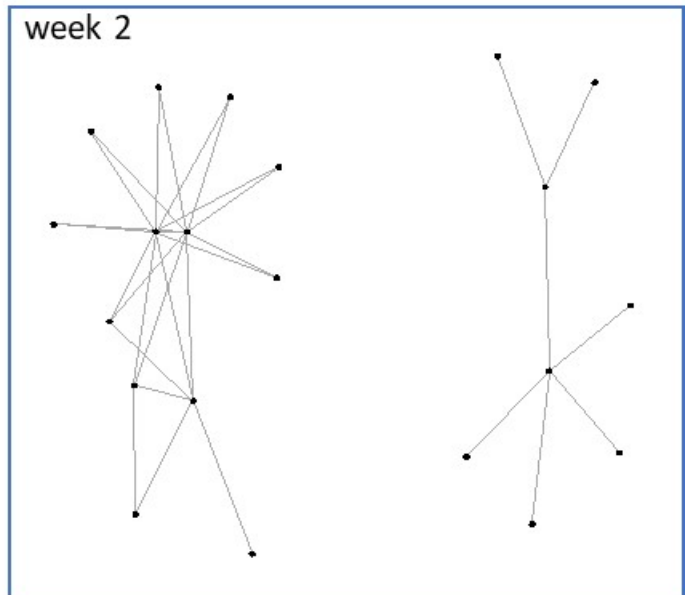

week 3

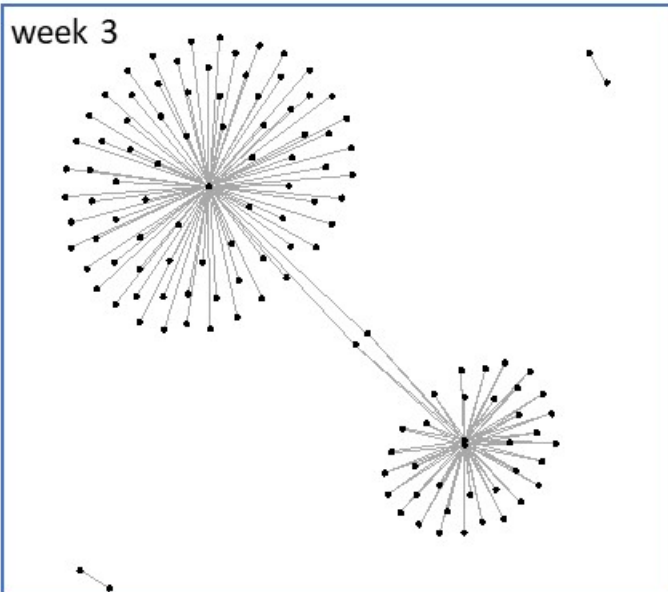

week 4

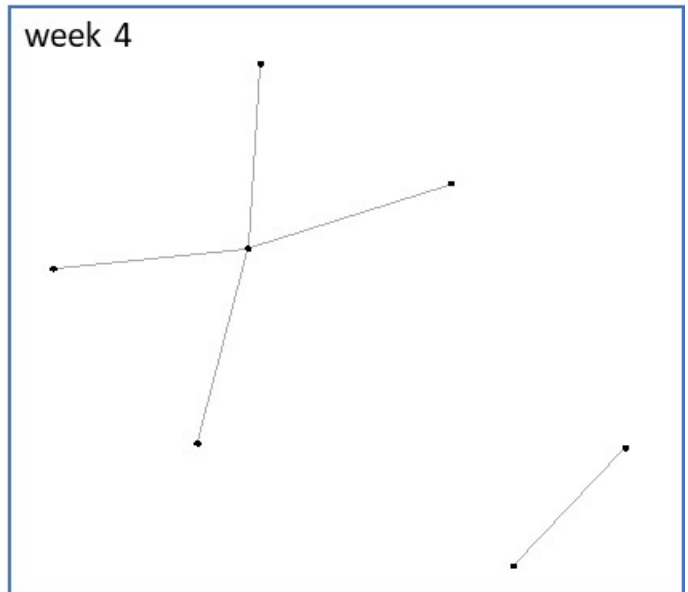

## January-2004

week 1

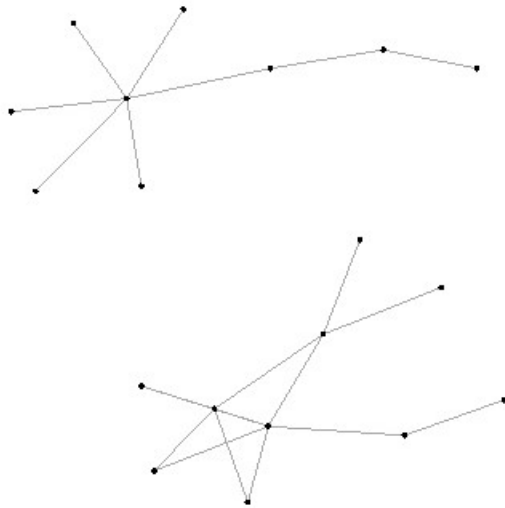

week 2

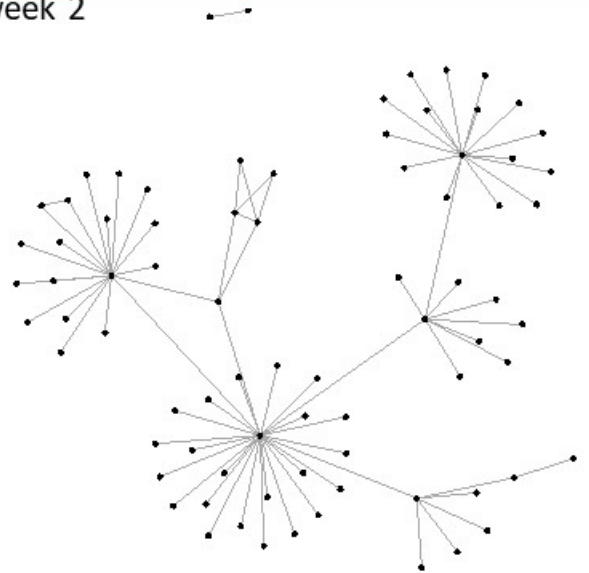

week 3

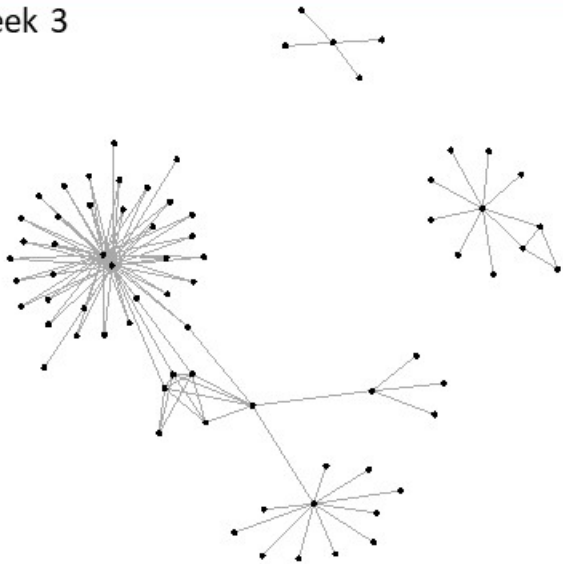

week 4

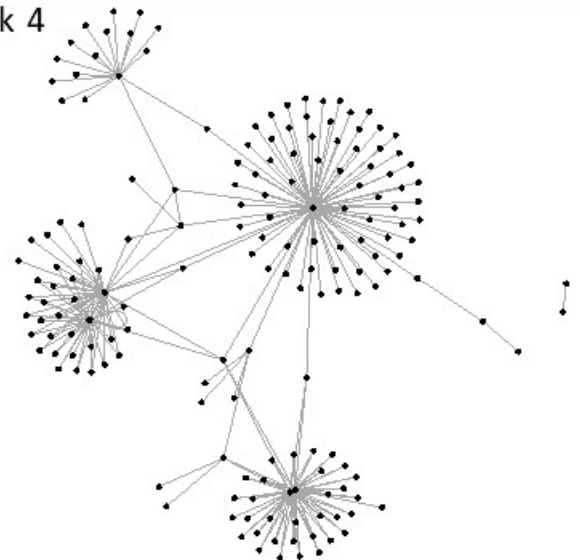



## February-2004

week 1

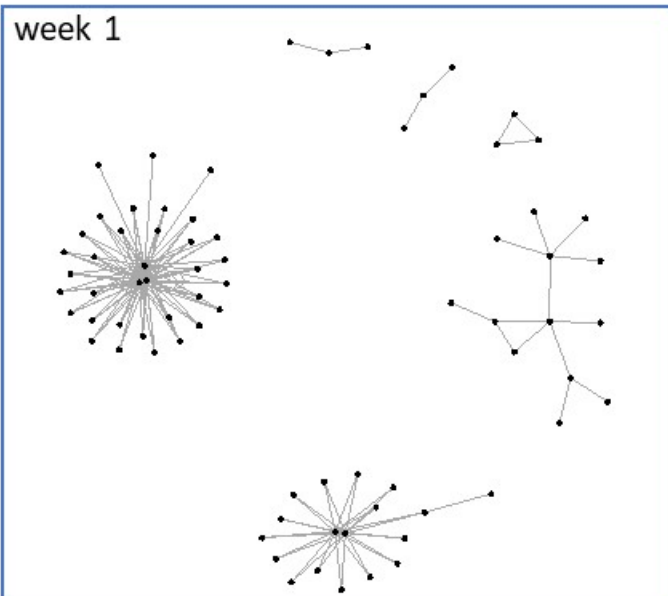

week 2

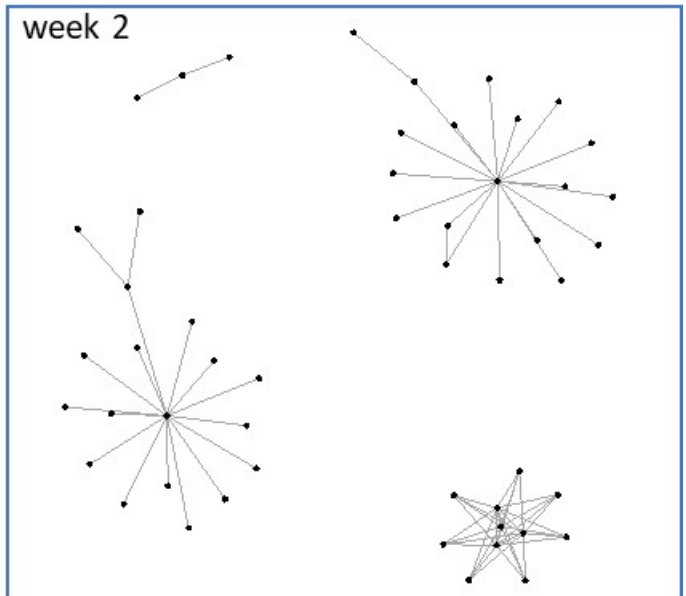

week 3

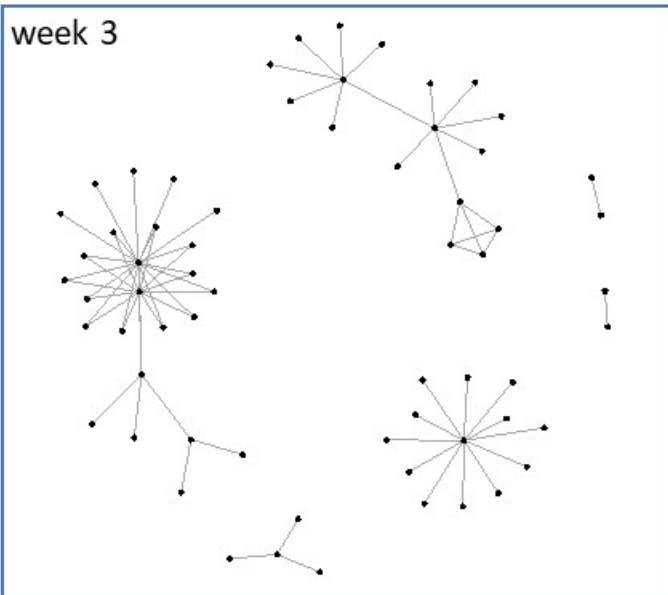

week 4

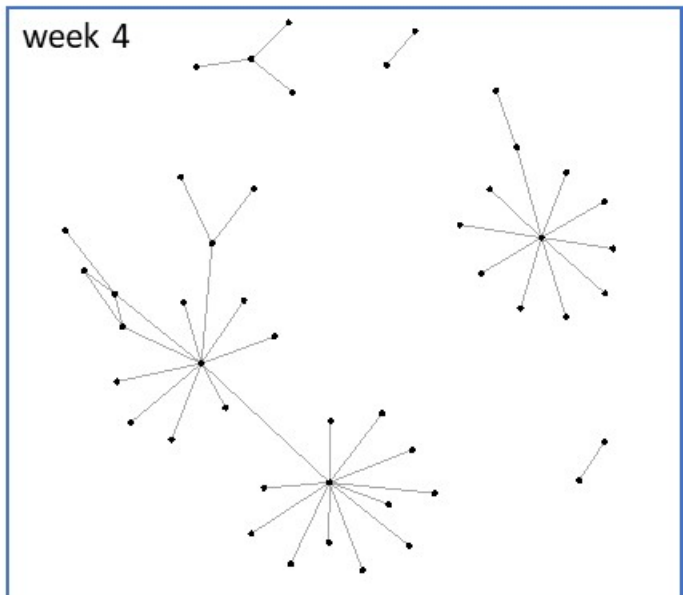

## March-2004

week 1

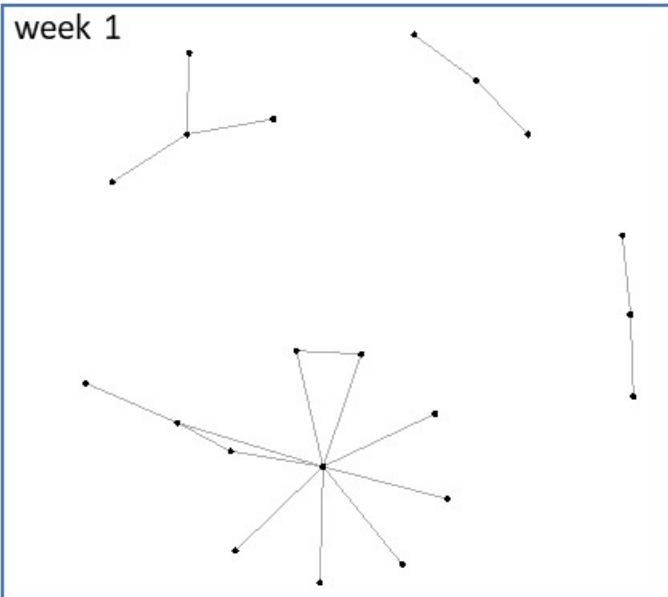

week 2

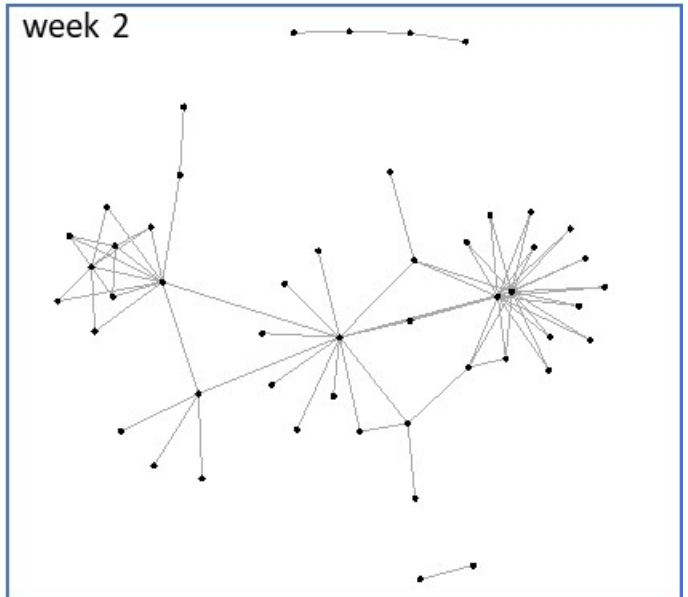

week 3

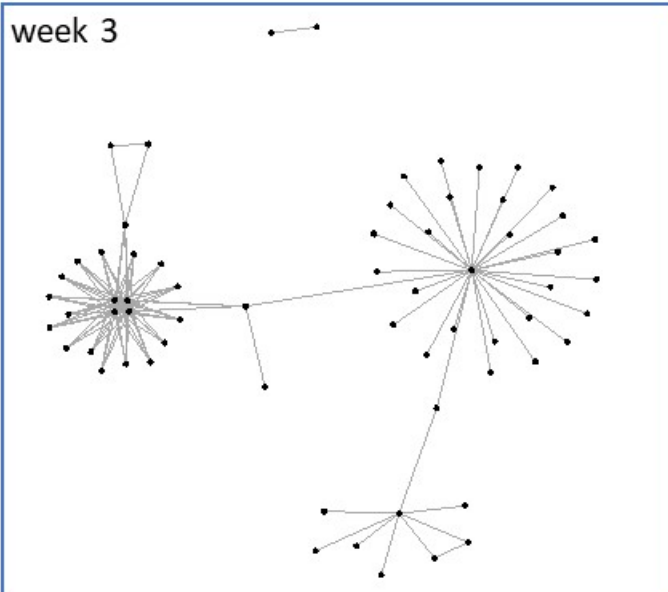

week 4

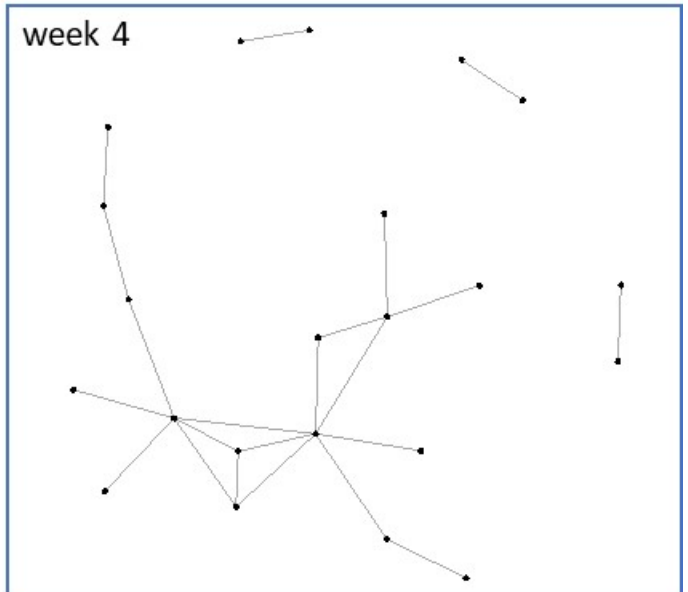

April-2004

week 1

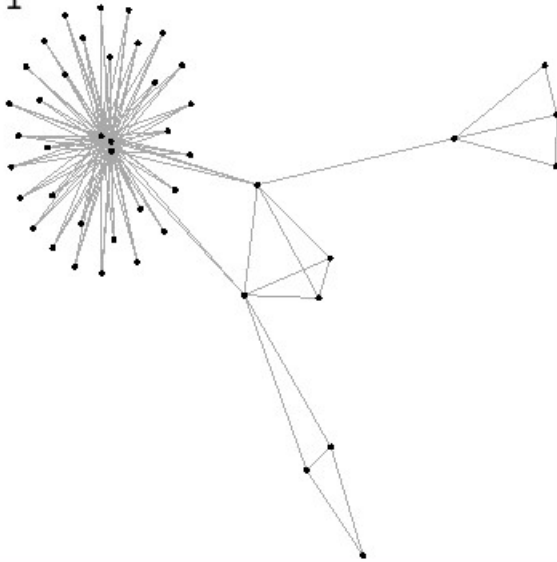

week 2

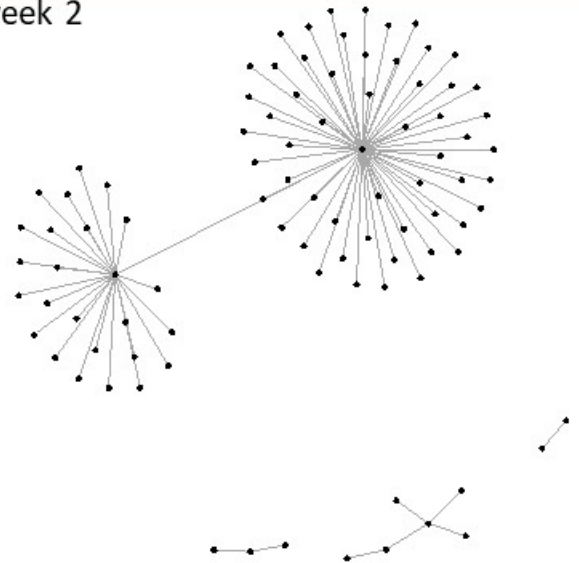

week 3

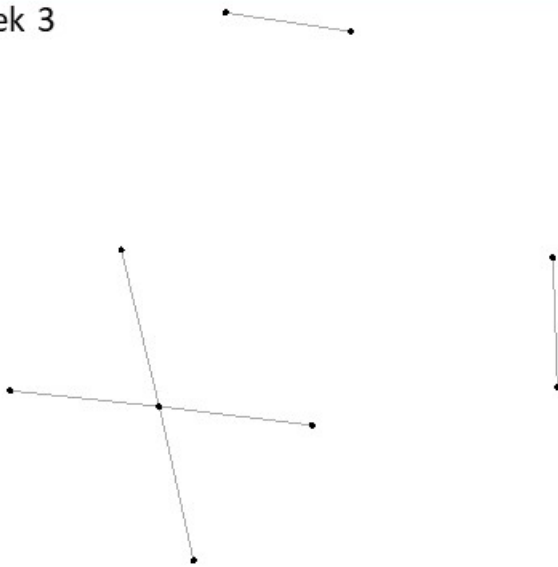

week 4

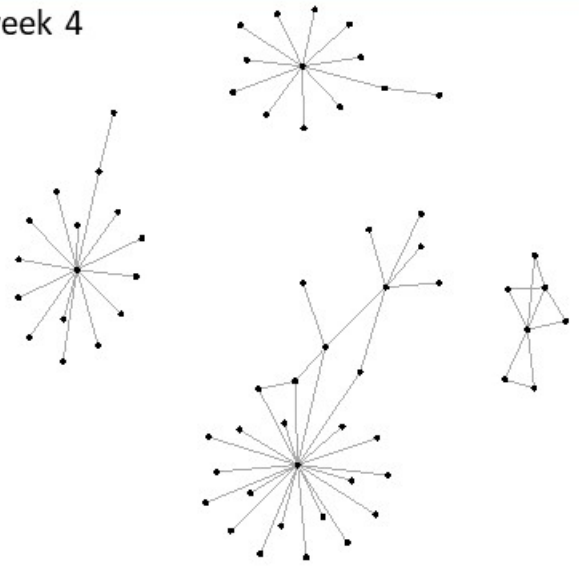

## May-2004

week 1

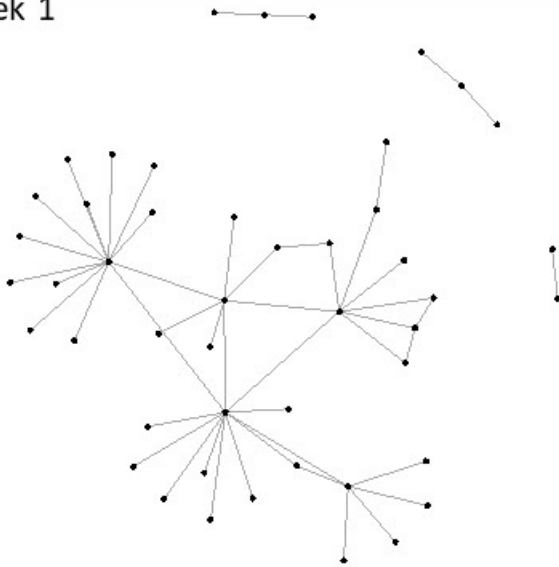

week 2

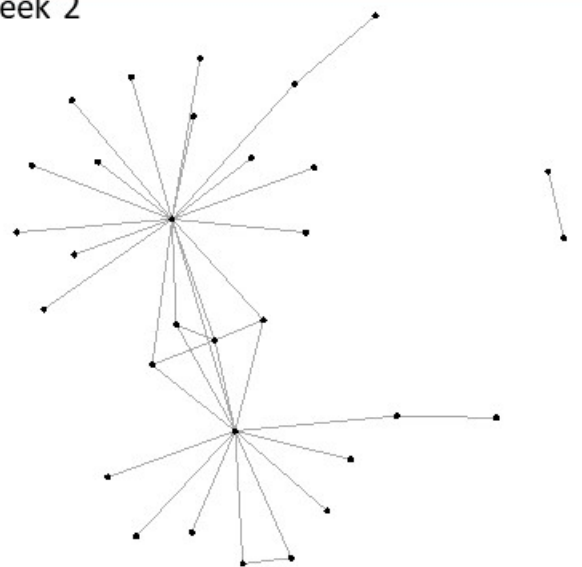

week 3

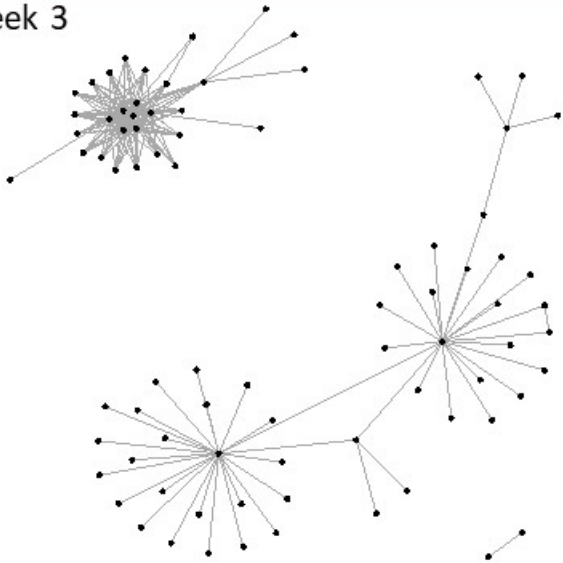

week 4

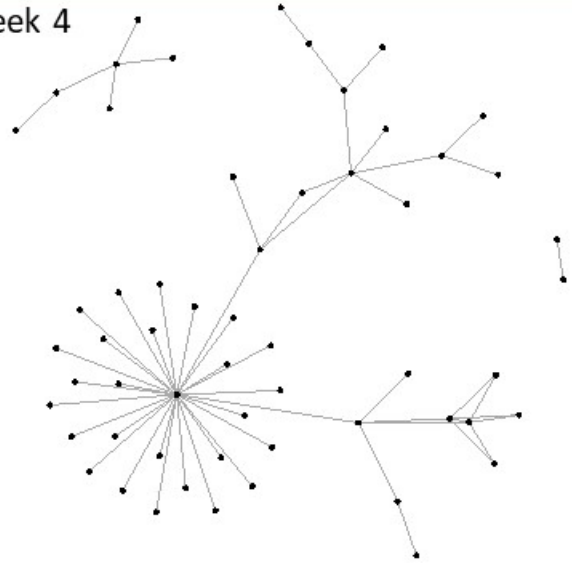

## June-2004

week 1

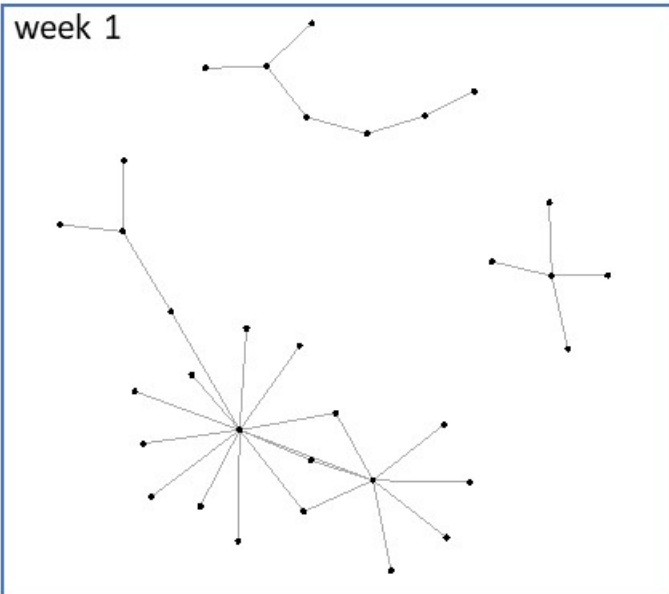

week 2

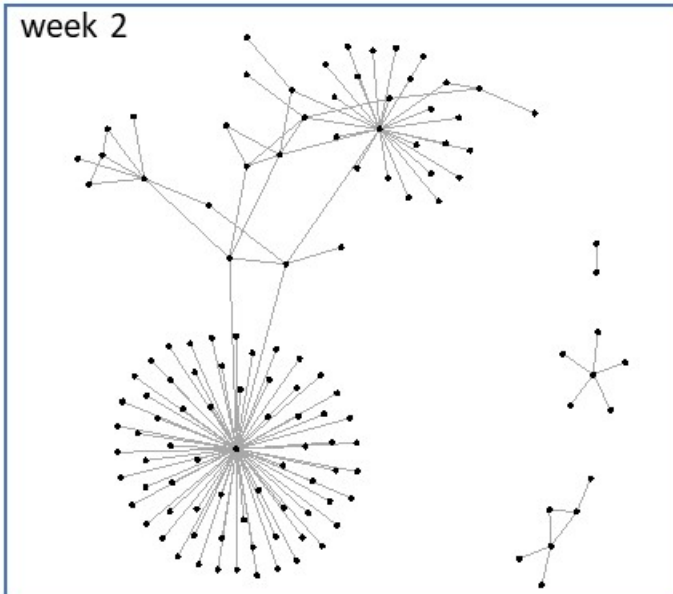

week 3

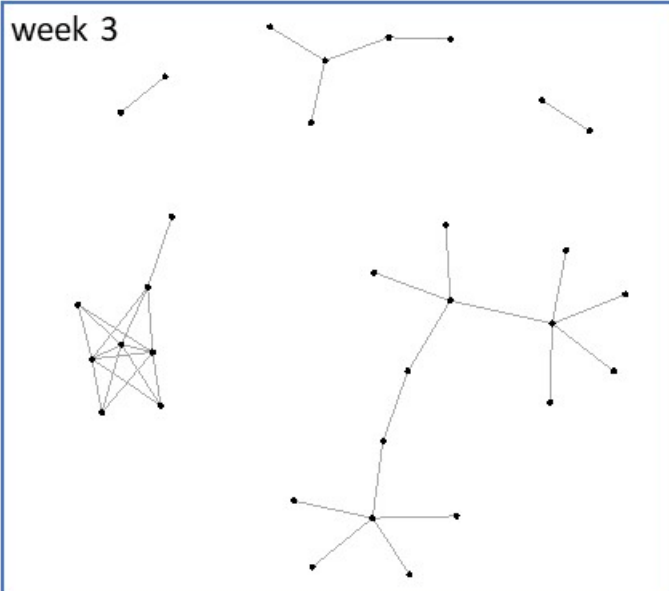

week 4

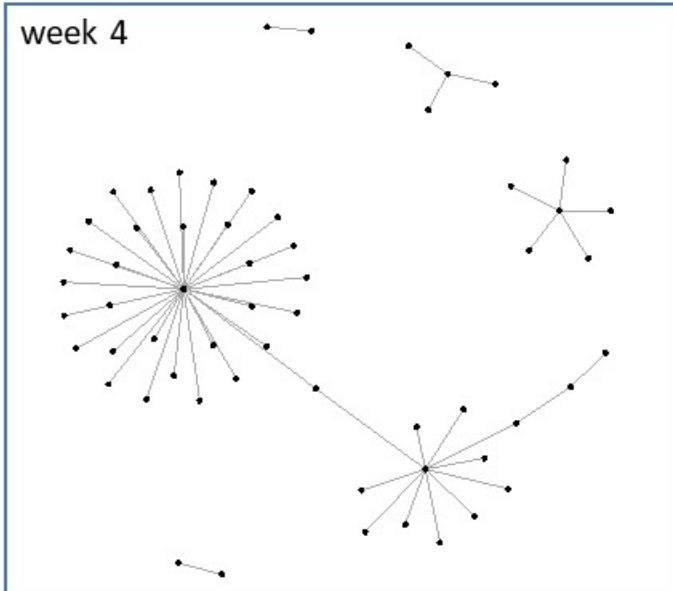

Supplement: Supplementary file 1 [file 15651200]
